**TITLE:** IMPACT OF PROPOFOL ON INTRACRANIAL DYNAMICS IN HEAD TRAUMA ICU PATIENTS.

**AUTHORS:** C Weinstabl, MD, N Mayer, MD, H Plattner, MD, CK Spiss, MD, AF Hammerle MD

**AFFILIATION:** Dept. of Anesthesia and General Intensive Care, Univ. of Vienna, A-1090 Vienna, Austria.

Previous investigations revealed a beneficial effect of propofol (P) on intracranial dynamics in patients undergoing elective neurosurgery. The present study evaluated the impact of P on ICP in head injured patients with normal or compromised intracranial compliance.

**Methods:** Epidural ICP-probes (GAELTEC) were implanted in a total of 14 patients with head injury. While heart rate, mean arterial pressure (MAP), ICP and ETCO<sub>2</sub> were recorded continuously, P was given in subsequent doses of 0.5, 1.0 and 2.0 mg/kg; 15 minutes elapsed after each administration. Data were evaluated 1, 2, 5 and 10 min after each application and pooled. The patients were allocated to either group I (ICP < 20 mmHg) or group II (ICP > 20 mmHg) according to their ICP baseline level. Statistical analysis was performed by one-way ANOVA. A *p* of less than 0.05 was

regarded as significant.

**Results:** In group I significant decreases of MAP were detected with 1.0 and 2.0 mg/kg P, whereas ICP and CPP changed only with the highest dose studied. While in group II significant decreases of MAP and ICP appeared with 1.0 and 2.0 mg/kg P, CPP was not affected significantly (Table).

**Discussion:** P decreased ICP in patients with normal and compromised intracranial compliance, in particular with 2.0 mg/kg P. As the responses to the hypotensive effects of P were mild and similar in both groups, inadvertent CPP drops were not observed with any of the doses studied. Thus, P can be used safely for the sedation of ICU-patients with head injury and normal or compromised intracranial compliance.

|        |    | T A B L E |                |       |       |
|--------|----|-----------|----------------|-------|-------|
|        |    | control   | Propofol mg/kg |       |       |
|        |    |           | 0.5            | 1.0   | 2.0   |
| MAP    | I  | 87±3      | 86±4           | 82±4* | 75±5* |
| (mmHg) | II | 88±4      | 86±4*          | 83±4* | 79±4* |
| ICP    | I  | 10±2      | 10±2           | 8±2   | 8±2*  |
| (mmHg) | II | 32±7      | 30±8           | 29±8* | 28±8* |
| CPP    | I  | 77±4      | 76±4           | 73±4  | 68±5* |
| (mmHg) | II | 56±11     | 56±11          | 54±11 | 51±10 |

means ± S.E.M., \* *p* < 0.05

## A1218

**TITLE:** HUMAN EEG DOSE RESPONSE TO DESFLURANE

**AUTHORS:** I.J. Rampil, M.D., S.H. Lockhart, Ph.D., M.D., E.I. Eger, M.D., R.B. Weiskopf, M.D.

**AFFILIATION:** Department of Anesthesia, University of California, San Francisco, 94143-0648

Desflurane (D) a derivative of isoflurane (I) has advantageous pharmacokinetics. In swine, EEG is indistinguishable between equipotent doses of D or I. Both agents cause burst suppression above 1.0 MAC. This report describes the EEG dose response to D in human volunteers.

**Methods.** Twelve healthy, young males (age = 23.8 ± 2.6 SD yrs) gave informed consent to this protocol which had been approved by the local Institutional Review Board. Subdermal electrodes provided a bilateral fronto-central and parieto-occipital montage. Subjects relaxed in a darkened room for >20 min before baseline measurements. Anesthesia was induced by inhalation of D and O<sub>2</sub> via face mask. Following endotracheal intubation, normocapnea and normothermia were maintained. Each subject received .83, 1.24, 1.67 and (if blood pressure was adequate) 2.1 MAC D, and at a different time, equipotent doses of D with 60% N<sub>2</sub>O (equilibration at each step >12 min). Hypocapnea (PETCO<sub>2</sub> ≈ 25 mmHg) was also induced at 1.24 MAC and the subject exposed to loud clapping at 1 Hz in an attempt to evoke seizures.

Four channels of EEG were displayed continuously by a prototype monitor (Interspec, Ambler, PA) and recorded on analog tape. The tapes were analyzed by a Macintosh IIx using Labview (National Instruments, Austin, TX) to derive: Burst Suppression Ratio (BSR), Spectral Edge Frequency (SEF) and Burst Compensated Spectral Edge Frequency (BSEF = SEF \* (1.0 - BSR/100)).

**Results.** Epileptiform activity did not occur. Low dose (0.83 MAC) D produced prominent α and β range activity similar to that seen with other volatile agents. Increasing doses of D progressively increased burst suppression (fig. 1); at a given MAC multiple this effect was diminished during D/N<sub>2</sub>O. BSEF declined with increasing dose (fig. 2).

**Discussion.** D produce similar cerebral electrical, and by extension, metabolic depression as I. There was no evidence of epileptogenicity. As with other inhaled anesthetics, the depression of EEG with D may be associated with decreased metabolic demand. It remains to be determined whether D uncouples cerebral blood flow from metabolic demand.

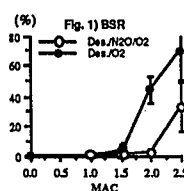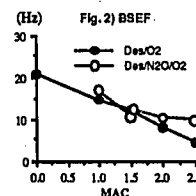

Source: https://asa2.silverchair.com/anesthesiology/article-pdf/73/3A/NA/667587/0000542-199009001-01217.pdf
